# Supplementary material
Source: MDPI journal article supplement (https://www.mdpi.com/2073-4395/12/1/101)
Supplement: s1 [file s1 › agronomy-1516662-supplementary.pdf]

## Supplementary Materials

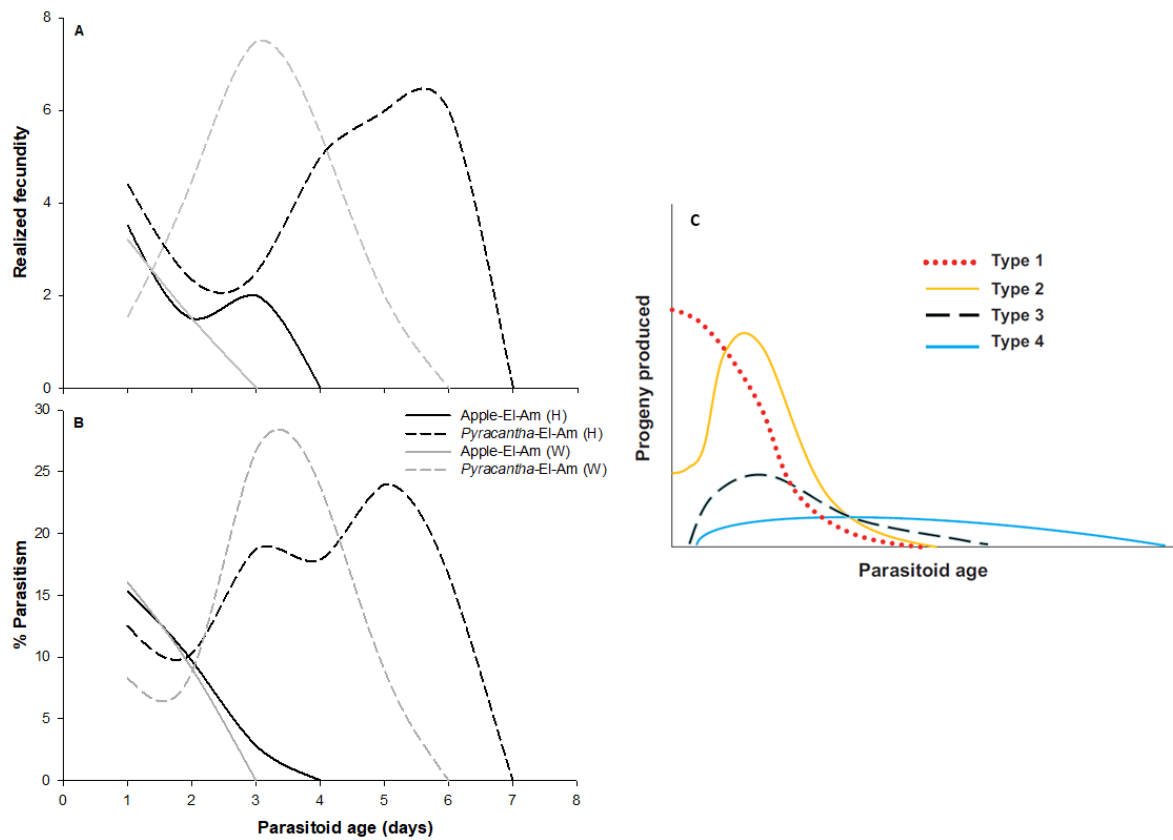

**Figure S1.** The realized fecundity per day (A) and the percentage of parasitism per day (B) during the lifespan of *A. mali* emerging from *E. lanigerum* of two HPC (apple trees and *Pyracantha coccinea*) and exposed to honey and water. Also, theoretical patterns of age-specific realized fecundity for parasitoids explained by Jervis et al. 2008 (C) [36].
